# Supplementary material for: Dispersion of Lutzomyia longipalpis and expansion of visceral leishmaniasis in São Paulo State, Brazil: identification of associated factors through survival analysis
Source: Parasit Vectors. 2018 Sep 10;11:503. doi: 10.1186/s13071-018-3084-1 (PMC6131759; doi:10.1186/s13071-018-3084-1)
Supplement: Supplementary file 2 — Table S2. Information about gas pipeline. Municipalities of SP where the northern section of the gas pipeline crosses, the construction starts dates, and the respective classification of the simultaneous or non-simultaneous construction in relation to the vector presence and disease in dogs and humans are presented. (XLSX 14 kb) [file 13071_2018_3084_MOESM2_ESM.xlsx]

## Sheet: Municipalities
order	MUN	start_Km	start_date	term_Km	finish_date	year_vect	month_vect	year_canin	month_canin	year_hum	month_hum	vect_gas	canine_gas	hum_gas
1	Cosmópolis	Km 5	1997-11-23	Km 0	1998-04-18	0	0	0	0	0	0	0	0	0
2	Americana	Km 17	1997-11-23	Km 5	1998-04-18	0	0	0	0	0	0	0	0	0
3	Limeira	Km 45	1997-11-30	Km 17	1999-04-03	0	0	0	0	0	0	0	0	0
4	Iracemápolis	Km 50	1997-11-30	Km 45	1998-09-22	0	0	0	0	0	0	0	0	0
5	Santa Gertudres	Km 59	1997-12-02	Km 50	1998-10-03	2012	5	0	0	0	0	0	0	0
6	Rio Claro	Km 84	1997-10-30	Km 59	1998-11-05	0	0	0	0	0	0	0	0	0
7	Itirapina	Km 107	1998-03-22	Km 84	1999-04-14	2005	0	0	0	0	0	0	0	0
8	São Carlos	Km 130	1998-03-20	Km 107	1999-04-18	2008	0	0	0	0	0	0	0	0
9	Ibaté	Km 149	1998-03-25	Km 130	1999-05-16	0	0	0	0	0	0	0	0	0
10	Araraquara	Km 155	1998-04-06	Km 149	1999-05-19	0	0	0	0	0	0	0	0	0
11	Ribeirão Bonito	Km 163	1998-04-07	Km 155	1999-05-20	0	0	0	0	0	0	0	0	0
12	Boa Esperança do Sul	Km 205	1998-04-14	Km 163	1999-05-21	0	0	0	0	0	0	0	0	0
13	Ibitinga	Km 242	1998-05-17	Km 205	1999-04-27	0	0	0	0	0	0	0	0	0
14	Iacanga	Km 258	1998-05-30	Km 242	1998-04-25	0	0	0	0	0	0	0	0	0
15	Reginópolis	Km 263	1998-04-30	Km 258	1999-04-27	0	0	0	0	0	0	0	0	0
16	Pirajuí	Km 272	1998-05-30	Km 263	1999-04-24	2005	8	2005	0	2006	1	0	0	0
17	Uru	Km 278	1998-05-30	Km 272	1999-05-03	0	0	0	0	0	0	0	0	0
18	Pongaí	Km 289	1998-06-10	Km 278	1999-05-05	0	0	0	0	2014	9	0	0	0
19	Cafelândia	Km 307	1998-06-16	Km 289	1999-05-10	2004	11	2004	0	2007	4	0	0	0
20	Lins	Km 328	1998-06-25	Km 307	1999-05-16	2003	3	2003	0	2003	10	0	0	0
21	Guaiçara	Km 336	1998-06-25	Km 328	1999-06-01	2003	8	2003	0	2004	10	0	0	0
22	Promissão	Km 348	1998-06-30	Km 336	1999-05-28	1999	9	1999	0	2002	6	1	1	0
23	Avanhandava	Km 358	1998-07-04	Km 348	1999-05-21	1999	9	1999	4	2002	10	1	1	0
24	Penapolis	Km 381	1998-07-18	Km 358	1999-05-24	1999	6	1999	4	2001	11	1	1	0
25	Glicério	Km 388	1998-07-20	Km 381	1999-04-20	1999	8	1999	10	0	0	1	1	0
26	Coroados	Km 391	1998-07-22	Km 388	1999-04-16	1999	7	2002	0	2002	9	1	0	0
27	Birigui	Km 406	1998-07-30	Km 391	1999-09-14	1998	12	1999	1	1999	7	1	1	1
28	Bilac	Km 412	1998-08-01	Km 406	1999-04-08	2000	11	2000	0	2002	11	0	0	0
29	Araçatuba	Km 422	1998-08-18	Km 412	1999-04-05	1997	4	1998	2	1999	1	0	0	1
30	Guararapes	Km 435	1998-08-14	Km 422	1999-03-26	1998	11	1999	1	2000	7	1	1	0
31	Rubiacea	Km 441	1998-08-18	Km 435	1999-03-30	2000	5	1999	8	2011	8	0	1	0
32	Bento de Abreu	Km 451	1998-08-25	Km 441	1999-03-26	1998	10	1999	4	2003	8	1	1	0
33	Valparaiso	Km 471	1998-09-06	Km 451	1999-05-27	1998	10	2000	0	2000	8	1	0	0
34	Lavinia	Km 481	1998-08-08	Km 471	1999-04-28	1999	9	1999	4	2001	11	1	1	0
35	Mirandopolis	Km 496	1998-09-09	Km 481	1999-04-16	1999	4	1999	2	2001	2	1	1	0
36	Guaraçai	Km 504	1998-09-20	Km 496	1999-03-16	1999	11	2000	0	2001	10	1	0	0
37	Murutinga do Sul	Km 512	1998-09-20	Km 504	1999-03-12	2000	3	2003	0	2003	8	1	0	0
38	Andradina	Km 518	1998-09-24	Km 513	1999-03-07	1998	9	1999	5	2001	1	1	1	0
39	Nova Independência	km 536	1998-08-25	km 518	1999-04-20	2001	1	2006	0	2006	12	0	0	0
40	Castilho	Km 548	1998-04-14	Km 536	1999-02-03	2000	1	2000	0	2001	12	1	0	0

## Sheet: Dictionary
NUM	Variable	Type	Description	Values (0=No; 1 = Yes)
1	order	continuous	order	number
2	MUN	categorical	name of municipality	name
3	start_Km	continuous	starting kilometer	Km
4	start_date	date	start date	day/month/year
5	term_Km	continual	terminal kilometer	Km
6	finish_date	date	finish date	day/month/year
7	year_vect	date	year in which vector was detected in the municipality	year
8	month_vect	date	month in which vector was detected in the municipality	month
9	year_canin	date	year in which canine VL was detected in the municipality	year
10	month_canin	date	month in which canine VL was detected in the municipality	month
11	year_hum	date	year in which human VL was detected in the municipality	year
12	month_hum	date	month in which human VL was detected in the municipality	month
13	vect_gas	categorical	detection of the vector during and/or after up to one year of construction of the gas pipeline in the municipality	0 or 1
14	canine_gas	categorical	detection of the canine VL during and/or after up to one year of construction of the gas pipeline in the municipality	0 or 1
15	hum_gas	categorical	detection of the human VL during and/or after up to one year of construction of the gas pipeline in the municipality	0 or 1
